# Supplementary material for: Surface-functionalized PAN fiber membranes for the sensitive detection of airborne specific markers
Source: PeerJ. 2024 Oct 23;12:e18077. doi: 10.7717/peerj.18077 (PMC11512550; doi:10.7717/peerj.18077)
Supplement: Supplemental Information 1 [file peerj-12-18077-s001.xlsx]

## Sheet: List1
Experiment - Effectivity of the functionalization													Experiment - The importance of humidity
1	OD of original bacterial suspension			0.152									1	OD of original bacterial suspension			0.152
	Sample	OD of BS on functionalized nanofibers FN(N)						OD AVERAGE	Final average	DEVIATION	t-test p-value			Sample	OD of BS on humidified functionalized nanofibers FN(N)						OD AVERAGE	Final average	DEVIATION	t-test p-value
	1	2.838	2.841	2.836	2.852	2.854	2.861	2.847	2.84011	0.0158336	1.00668e-06			1	-						-	0.847917	0.0588077	p1 (FNn and FNs)		0.0321895
	2	2.846	2.848	2.857	2.852	2.85	2.855	2.85133						2	0.887	0.888	0.889	0.89	0.892	0.891	0.8895			p2 (FNs and UNn)		0.00694674
	3	2.82	2.824	2.826	2.824	2.817	2.821	2.822						3	0.804	0.805	0.806	0.807	0.808	0.808	0.806333
		OD of BS on unmodified nanofibers UN(N)													OD of BS on unhumidified functionalized nanofibers FN(S)
	1	1.849	1.856	1.848	1.688	1.687	1.686	1.769	2.23517	0.407917				1	-						-	0.80925	0.0529152
	2	2.404	2.406	2.409	2.411	2.415	2.414	2.40983						2	0.844	0.845	0.85	0.851	0.85	0.84	0.846667
	3	2.544	2.541	2.542	2.516	2.512	2.505	2.52667						3	0.77	0.771	0.772	0.772	0.773	0.773	0.771833
2	OD of original bacterial suspension			0.191											OD of BS on humidified unmodified nanofibers UN(N)
	Sample	OD of BS on functionalized nanofibers FN(N)												1	-							0.707667	0.141186
	1	1.713	1.711	1.712	1.707	1.708	1.706	1.7095	1.59456	0.100706	3.89637e-08			2	0.81	0.809	0.806	0.805	0.806	0.809	0.8075
	2	1.525	1.522	1.522	1.521	1.52	1.521	1.52183						3	0.609	0.609	0.608	0.607	0.608	0.606	0.607833
	3	1.555	1.554	1.552	1.55	1.549	1.554	1.55233					2	OD of original bacterial suspension			0.193
		OD of BS on unmodified nanofibers UN(N)												Sample	OD of BS on humidified functionalized nanofibers FN(N)
	1	1.48	1.479	1.481	1.482	1.482	1.481	1.48083	1.41694	0.0716351				1	1.042	1.043	1.045	1.046	1.042	1.042	1.04333	1.05872	0.00648181	p1 (FNn and FNs)		1.77921e-17
	2	1.432	1.432	1.431	1.43	1.429	1.429	1.4305						2	1.062	1.06	1.062	1.061	1.064	1.062	1.06183			p2 (FNs and UNn)		0.106749
	3	1.337	1.338	1.339	1.338	1.343	1.342	1.3395						3	1.072	1.071	1.072	1.07	1.069	1.072	1.071
3	OD of original bacterial suspension			0.193											OD of BS on unhumidified functionalized nanofibers FN(S)
	Sample	OD of BS on functionalized nanofibers FN(N)												1	0.803	0.803	0.803	0.802	0.801	0.799	0.801833	0.825389	0.0523259
	1	1.067	1.068	1.07	1.071	1.071	1.071	1.06967	0.921833	0.134611	0.000729304			2	0.799	0.8	0.801	0.8	0.801	0.8	0.800167
	2	0.887	0.888	0.889	0.89	0.892	0.891	0.8895						3	0.875	0.874	0.875	0.874	0.874	0.873	0.874167
	3	0.804	0.805	0.806	0.807	0.808	0.808	0.806333							OD of BS on humidified unmodified nanofibers UN(N)
		OD of BS on unmodified nanofibers UN(N)												1	0.897	0.904	0.903	0.904	0.906	0.907	0.9035	0.772944	0.141186
	1	0.897	0.904	0.903	0.904	0.906	0.907	0.9035	0.772944	0.150832				2	0.81	0.809	0.806	0.805	0.806	0.809	0.8075
	2	0.81	0.809	0.806	0.805	0.806	0.809	0.8075						3	0.609	0.609	0.608	0.607	0.608	0.606	0.607833
	3	0.609	0.609	0.608	0.607	0.608	0.606	0.607833					3	OD of original bacterial suspension			0.72
4	OD of original bacterial suspension			0.193										Sample	OD of BS on humidified functionalized nanofibers FN(N)
	Sample	OD of BS on functionalized nanofibers FN(N)							* the second series for experiment 3					1	1.401	1.399	1.399	1.401	1.4	1.3	1.38333	1.63339	0.224035	p1 (FNn and FNs)		0.0110785
	1	1.042	1.043	1.045	1.046	1.042	1.042	1.04333	1.05872	0.0140933	2.69097e-08			2	1.597	1.598	1.603	1.602	1.602	1.598	1.6			p2 (FNs and UNn)		6.95412e-07
	2	1.062	1.06	1.062	1.061	1.064	1.062	1.06183						3	1.973	1.903	1.905	1.908	1.905	1.907	1.91683
	3	1.072	1.071	1.072	1.07	1.069	1.072	1.071							OD of BS on unhumidified functionalized nanofibers FN(S)
		OD of BS on unmodified nanofibers UN(N)												1	0.902	0.903	0.901	0.898	0.897	0.901	0.900333	1.36683	0.141304
	1	0.897	0.904	0.903	0.904	0.906	0.907	0.9035	0.772944	0.150832				2	1.502	1.502	1.501	1.5	1.498	1.498	1.50017
	2	0.81	0.809	0.806	0.805	0.806	0.809	0.8075						3	1.7	1.701	1.699	1.699	1.698	1.703	1.7
	3	0.609	0.609	0.608	0.607	0.608	0.606	0.607833							OD of BS on humidified unmodified nanofibers UN(N)
5	OD of original bacterial suspension			0.088										1	0.147	0.151	0.151	0.153	0.152	0.148	0.150333	0.5435	0.57971
	Sample	OD of BS on functionalized nanofibers FN(N)												2	0.329	0.332	0.33	0.329	0.33	0.331	0.330167
	1	2.12	2.118	2.119	2.121	2.118	2.12	2.11933	2.04956	0.0787525	0.0233074			3	1.148	1.149	1.152	1.151	1.15	1.15	1.15
	2	1.965	1.965	1.963	1.964	1.964	1.964	1.96417					4	OD of original bacterial suspension			0.96
	3	2.065	2.063	2.064	2.065	2.067	2.067	2.06517						Sample	OD of BS on humidified functionalized nanofibers FN(N)
		OD of BS on unmodified nanofibers UN(N)												1	1.632	1.63	1.631	1.628	1.628	1.63	1.62983	1.575	0.568867	p1 (FNn and FNs)		4.19727e-07
	1	2.088	2.09	2.089	2.09	2.092	2.089	2.09	1.977	0.131275				2	1.147	1.148	1.146	1.144	1.144	1.143	1.14533			p2 (FNs and UNn)		3.83814e-11
	2	1.831	1.832	1.833	1.832	1.834	1.833	1.833						3	1.947	1.949	1.949	1.952	1.951	1.951	1.94983
	3	2.007	2.01	2.008	2.009	2.008	2.006	2.008							OD of BS on unhumidified functionalized nanofibers FN(S)
														1	0.901	0.902	0.903	0.899	0.895	0.902	0.900333	0.966778	0.282843
6	OD of original bacterial suspension			0.114					* the new series for experiment					2	1.198	1.2	1.202	1.199	1.2	1.201	1.2
	Sample	OD of BS on functionalized nanofibers FN(N)												3	0.8	0.8	0.801	0.8	0.798	0.801	0.8
	1	0.497	0.497	0.496	0.496	0.496	0.496	0.496333	0.481389	0.0300168	1.03661e-06				OD of BS on humidified unmodified nanofibers UN(N)
	2	0.445	0.446	0.447	0.447	0.448	0.448	0.446833						1	0.351	0.348	0.345	0.354	0.352	0.347	0.3495	0.379722	0.0348839
	3	0.501	0.502	0.501	0.502	0.501	0.499	0.501						2	0.371	0.372	0.371	0.368	0.37	0.369	0.370167
		OD of BS on unmodified nanofibers UN(N)												3	0.416	0.417	0.42	0.422	0.42	0.422	0.4195
	1	0.202	0.202	0.201	0.201	0.202	0.203	0.201833	0.285233	0.136139			5	OD of original bacterial suspension			0.114
	2	0.441	0.442	0.443	0.443	0.443	0.442	0.442333						Sample	OD of BS on humidified functionalized nanofibers FN(N)
	3	0.212	0.2112	0.212	0.212	0.211	0.211	0.211533						1	0.643	0.64	0.638	0.637	0.635	0.633	0.637667	0.626778	0.117546	p1 (FNn and FNs)		7.72333e-06
														2	0.742	0.742	0.741	0.737	0.736	0.733	0.7385			p2 (FNs and UNn)		0.305002
														3	0.503	0.503	0.504	0.505	0.505	0.505	0.504167
															OD of BS on unhumidified functionalized nanofibers FN(S)
														1	0.497	0.497	0.496	0.496	0.496	0.496	0.496333	0.481389	0.0300168
														2	0.445	0.446	0.447	0.447	0.448	0.448	0.446833
														3	0.501	0.502	0.501	0.502	0.501	0.499	0.501
															OD of BS on humidified unmodified nanofibers UN(N)
														1	0.441	0.442	0.443	0.443	0.443	0.442	0.442333	0.492944	0.0471028
														2	0.501	0.502	0.501	0.502	0.499	0.501	0.501
														3	0.537	0.536	0.536	0.535	0.535	0.534	0.5355

## Sheet: Sheet1
Figure 5			Figure 6				Figure 7
UN(N)	FN(N)		UN(N)	FN(N)	FN(S)		Unmodified nanofibers UN(N)							Average	Deviation	t test
2.235	2.84		0.708	0.848	0.809		UN1	0.002	0.002	0.002	0.001	0.001	0.001	0.0015	0.000547723	4.45872e-12
1.417	1.595		0.773	1.059	0.825		UN2	0.004	0.004	0.003	0.003	0.003	0.003	0.00333333	0.000516398	2.41684e-08
0.773	0.922		0.544	1.633	1.367		UN3	0.01	0.011	0.011	0.012	0.012	0.013	0.0115	0.00104881	1.44156e-06
0.773	1.059		0.38	1.575	0.967		Functionalized nanofibers FN(N)
1.977	2.05		0.493	0.627	0.481		FN1	0.014	0.014	0.014	0.014	0.014	0.013	0.0138333	0.000408248
0.285	0.481						FN2	0.016	0.016	0.016	0.016	0.016	0.016	0.016	0
							FN3	0.02	0.019	0.019	0.019	0.019	0.019	0.0191667	0.000408248
